# Supplementary material
Source: HighWire-hosted journal article supplement (http://ajnr-stage2.highwire.org/highwire/filestream/98703/field_highwire_adjunct_files/0/0358.pdf)
Supplement: 0358.pdf [file 0358.pdf]

**Supplementary Table 1.** Sensitivity analysis

|                                          | Crude |                | Multivariate adjustment |                |
|------------------------------------------|-------|----------------|-------------------------|----------------|
|                                          | OR    | (95% CI)       | OR                      | (95% CI)       |
| Revascularization area posterior to CS*  | 1.53  | (1.20 , 1.95)  | 1.57                    | (1.21 , 2.03)  |
| Female                                   | 3.44  | (0.94 , 12.59) | 3.96                    | (0.66 , 23.88) |
| Hemorrhagic presentation                 | 0.3   | (0.08 , 1.11)  | 0.95                    | (0.13 , 6.75)  |
| SPECT Stage 2 in posterior MCA territory | 2.91  | (0.59 , 14.34) | 0.93                    | (0.10 , 8.99)  |

\*Every 1% increase. CS, central sulcus; MCA, middle cerebral artery.

**Supplementary Table 2.** Factors associated with overall revascularization area

| Variable             | Group             | No. of hemispheres | Overall revascularization area, in %* | P value† |
|----------------------|-------------------|--------------------|---------------------------------------|----------|
| Age‡                 | ≥ 12              | 40                 | 26.2 ± 12.6                           | .99      |
|                      | < 12              | 40                 | 26.2 ± 9.6                            |          |
| Sex                  | Female            | 47                 | 28.6 ± 10.1                           | .02      |
|                      | Male              | 33                 | 22.7 ± 11.9                           |          |
| Initial presentation | Hemorrhage        | 17                 | 22.6 ± 12.4                           | .14      |
|                      | Ischemia or other | 63                 | 27.1 ± 10.7                           |          |
| Suzuki stage‡        | ≥ 3               | 62                 | 27.2 ± 11.6                           | .08      |
|                      | < 3               | 18                 | 22.5 ± 9.1                            |          |
| PCA involvement      | Yes               | 10                 | 39.9 ± 9.7                            | < .001   |
|                      | No                | 70                 | 24.2 ± 9.9                            |          |
| SPECT stage          | Stage 2           | 37                 | 30.7 ± 11.1                           | < .001   |
|                      | Stage 0 or 1      | 43                 | 22.2 ± 9.7                            |          |
| Addition of EMS      | Yes               | 21                 | 29.4 ± 9.8                            | .12      |
|                      | No                | 59                 | 25.0 ± 11.5                           |          |

\*Percentage relative to whole supratentorial area.

†t-test.

‡Cut-off levels were set according to the median value.

EMS, encephalomyosynangiosis; PCA, posterior cerebral artery.
